# Supplementary material for: Endothelial HIF-2 mediates protection and recovery from ischemic kidney injury
Source: JCI journal article supplement (doi:10.1172/jci69073), 2014-05-01
Supplement: sd1 [file 1]

## Supplemental Data

**Table S1. Analysis of physiologic parameters in *Hif1aHif2a* mutants.** Shown are data for *Hif1aHif2a*<sup>-/-</sup> and *Cre*<sup>-</sup> littermate control mice (n=4-5). **Abb.:** NS, not statistically significant.

| Parameter               | Unit                             | <i>Cre</i> <sup>-</sup> | <i>Hif1aHif2a</i> | P  |
|-------------------------|----------------------------------|-------------------------|-------------------|----|
| <i>Body weight</i>      | g                                | 23.6 ± 1.3              | 24 ± 1.3          | NS |
| <i>Kidney weight</i>    | mg                               | 180 ± 12.5              | 185 ± 11          | NS |
| <i>Hgb</i>              | g/dL                             | 15.7 ± 1.37             | 15.1 ± 0.31       | NS |
| <i>RBC</i>              | 10 <sup>6</sup> /mm <sup>3</sup> | 13.07 ± 1.56            | 12.32 ± 0.7       | NS |
| <i>WBC</i>              | 10 <sup>3</sup> /mm <sup>3</sup> | 10.3 ± 1.33             | 9.49 ± 1.12       | NS |
| <i>PLTs</i>             | 10 <sup>3</sup> /mm <sup>3</sup> | 1060 ± 46               | 1242 ± 88         | NS |
| <i>Ser. Epo</i>         | pg/ml                            | 161 ± 67                | 129 ± 32          | NS |
| <i>BUN</i>              | mg/dL                            | 29 ± 1.8                | 26 ± 1.4          | NS |
| <i>Na<sup>+</sup></i>   | mmol/L                           | 148 ± 0.7               | 148 ± 0.9         | NS |
| <i>K<sup>+</sup></i>    | mmol/L                           | 6 ± 0.3                 | 6 ± 0.1           | NS |
| <i>Cl<sup>-</sup></i>   | mmol/L                           | 113 ± 0.3               | 114 ± 1.2         | NS |
| <i>Glucose</i>          | mg/dL                            | 195 ± 9.5               | 192 ± 10          | NS |
| <i>Urine Prot/Creat</i> | µg/mg                            | 20.7 ± 6.8              | 11 ± 3.8          | NS |

## Supplemental Figures

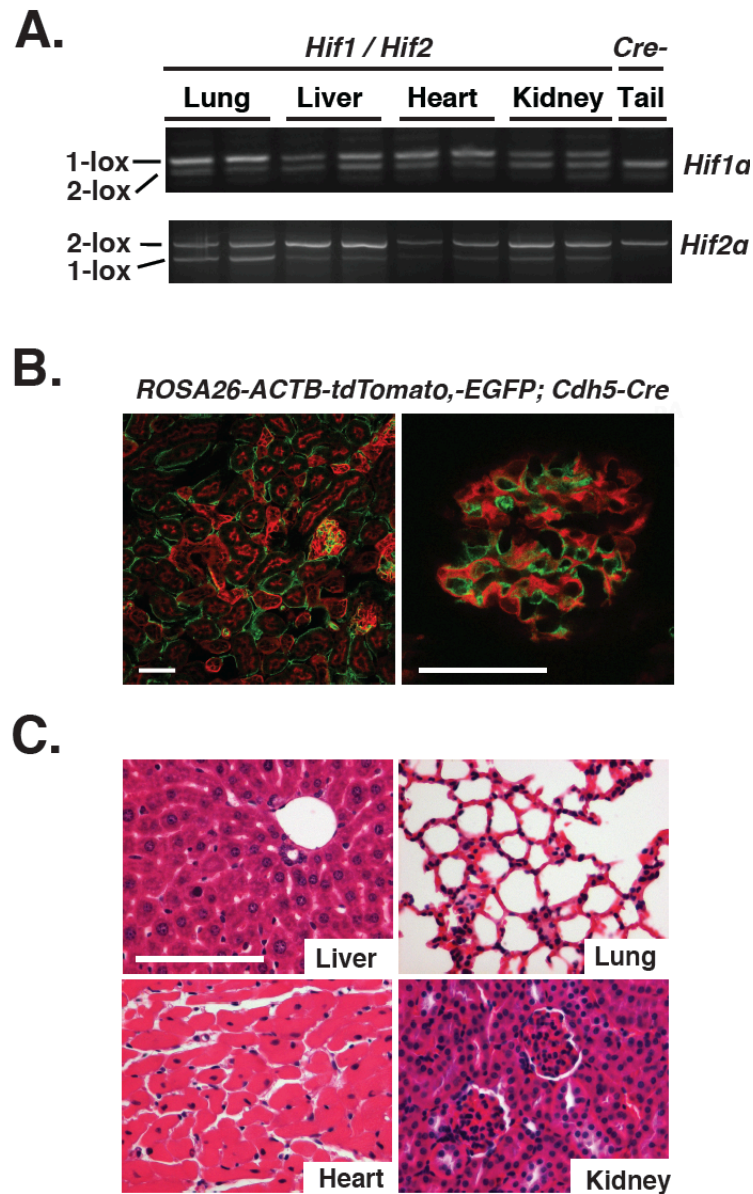

**Figure S1. Generation of EC-specific *Hif1aHif2a* mutants.** (A) Genomic PCR analysis of lung, liver, heart and kidney tissue from mice homozygous for the conditional *Hif1a* and *Hif2a* alleles. (B) Representative images of 50  $\mu$ m kidney tissue sections from *ROSA26-ACTB-tdTomato,-EGFP* reporter (*mT/mG*) mice crossed with *Cdh5-cre* transgenics. Sections were analyzed by confocal laser scanning microscopy. Cells with a history of *Cdh5-cre* expression are identified by green fluorescence (glomerular and peritubular ECs), cells without history of *Cdh5-cre* expression are identified by red fluorescence. (C) Representative images of H&E stained liver, heart, lung and kidney sections from *Hif1aHif2a*<sup>-/-</sup> mice. Scale bars represent 100  $\mu$ m.

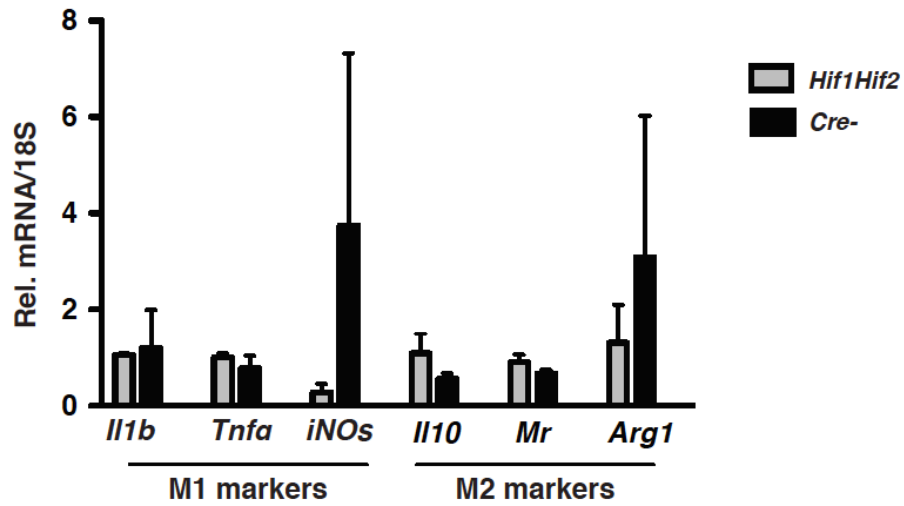

**Figure S2. Inactivation of endothelial HIF does not alter macrophage polarization post UUO.** RT-PCR analysis of M1 and M2 macrophage markers in CD11b<sup>+</sup> cells isolated from EC-specific *Hif1aHif2a*<sup>-/-</sup> and *Cre*<sup>-</sup> UUO kidneys 12 days after ligation. Graph bars represent mean values  $\pm$  SEM.

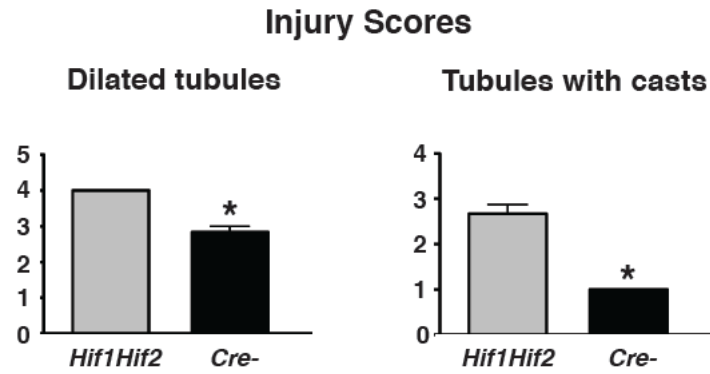

**Figure S3. Kidney injury scores.** Shown are semi-quantitative scores for dilated tubules and tubules with cast-forming material from *Hif1aHif2a*<sup>-/-</sup> mice compared to *Cre*<sup>-</sup> littermates at day 3 post IRI (n=6). Graph bars represent mean values ± SEM; \*, P<0.05. **Abb.:** ns, not statistically significant.

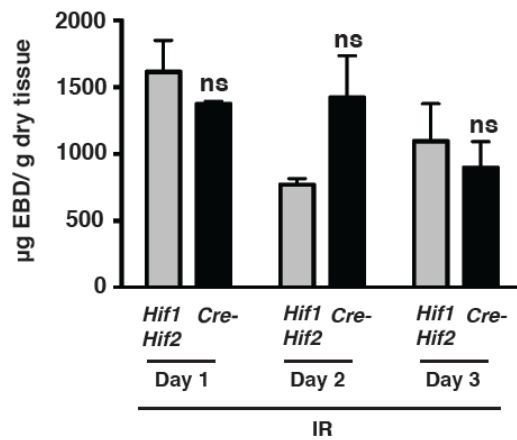

**Figure S4. Inactivation of endothelial HIF-1 $\alpha$  and HIF-2 $\alpha$  does not alter renal vascular permeability in IRI kidneys.** EBD permeability in injured kidneys from *Hif1aHif2a*<sup>-/-</sup> mice and *Cre*<sup>-</sup> littermate controls at time points indicated (n=3-5). Graph bars represent mean ± SEM; **Abb.:** ns, not statistically significant.

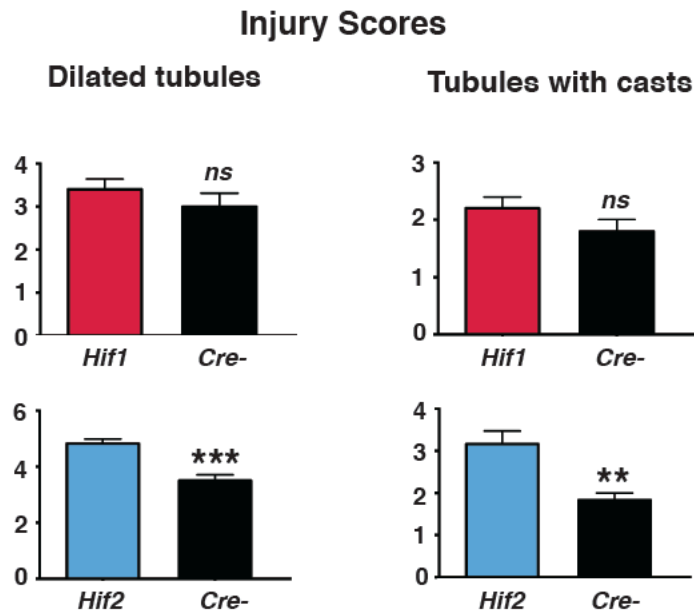

**Figure S5. Kidney injury scores.** Semi-quantitative scores for dilated tubules and tubules with cast-forming material from *Hif1a*<sup>-/-</sup> compared to control animals (n=5) and *Hif2a* mutants compared to littermate controls (n=6) at day 3 post IRI. Graph bars represent mean values ± SEM; \*\*, P<0.01, \*\*\*, P<0.001. **Abb.:** ns, not statistically significant.

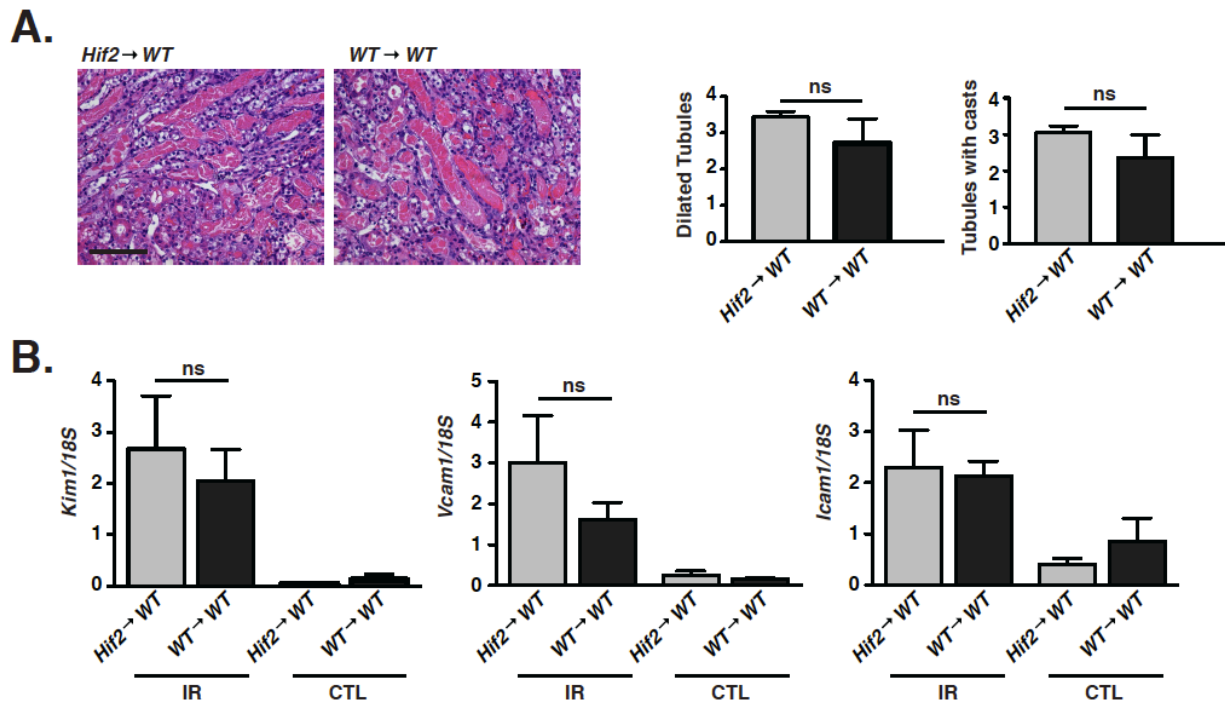

**Figure S6. *Hif2*<sup>-/-</sup> bone marrow cells do not contribute to renal IRI.** Results from the analysis of WT mice, which were transplanted with either bone marrow cells derived from *Cdh5-cre Hif2a* mutants (*Hif2*→WT) or from WT mice (WT→WT) and subjected to renal IRI. **(A)** H&E staining of kidney sections 3 days post IRI and semi-quantitative scores for dilated tubules and tubules with cast-forming material (n= 4-5). **(B)** Shown are corresponding *Kim1*, *Vcam1* and *Icam1* mRNA levels in IR and CTL kidneys. Graph bars represent mean values ± SEM. **Abb.:** ns, not statistically significant; IR, kidney subjected to unilateral renal ischemia-reperfusion; CTL, contralateral kidney. Scale bars indicate 100 μm.

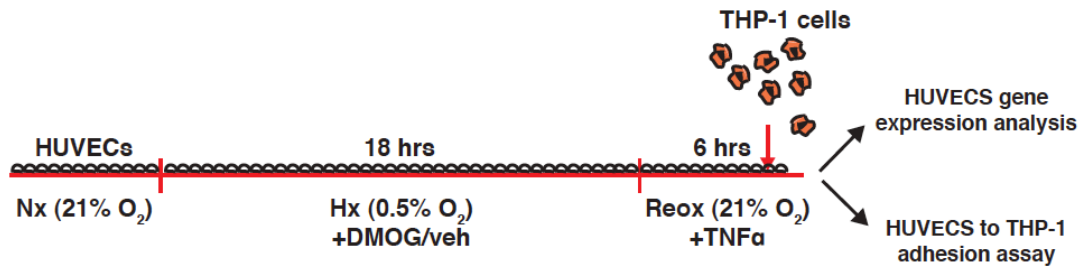

**Figure S7. Experimental protocol for studying the effect of HIF prolyl-hydroxylase inhibition on endothelial cells.** Shown are the timing and experimental conditions to study the role of hypoxia-reoxygenation on EC adhesion molecule expression and cell adhesion. **Abb.:** Hx, hypoxia; Nx, normoxia; Reox, reoxygenation; TNFα, tumor necrosis factor α.

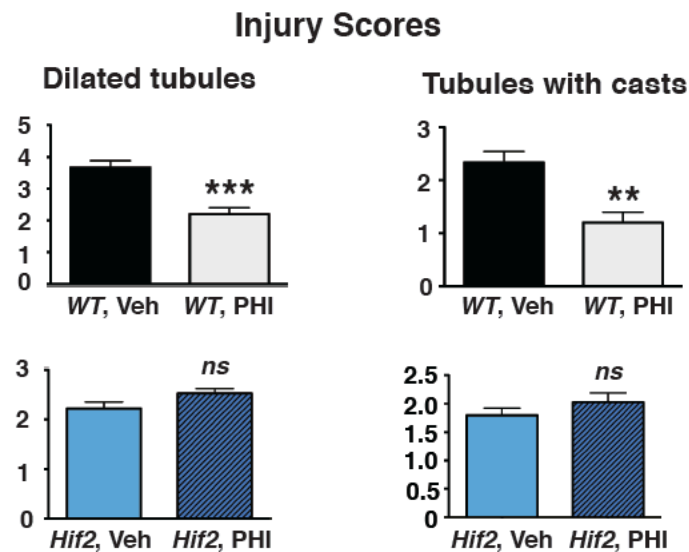

**Figure S8. Kidney injury scores.** Shown are semi-quantitative scores for dilated tubules and tubules with cast-forming material from mice of different genotypes at day 3 post IRI: PHI- and vehicle treated WT mice (n=5-6); PHI- and vehicle treated *Hif2a* mutants (n=4-5). Graph bars represent mean values ± SEM; \*\*, P<0.01, \*\*\*, P<0.001. **Abb.:** ns, not statistically significant.
